# Supplementary material for: Development of the Japanese 15D Instrument of Health-Related Quality of Life: Verification of Reliability and Validity among Elderly People
Source: PLoS One. 2013 Apr 16;8(4):e61721. doi: 10.1371/journal.pone.0061721 (PMC3627920; doi:10.1371/journal.pone.0061721)
Supplement: Appendix S1 — The Japanese version of the 15D. (PDF) [file pone.0061721.s001.pdf]

## 生活の質についての質問表(15D)

それぞれの質問について、すべての選択肢を読んで、**あなたの現在の健康状態**を最もよくあらわしている選択肢に、○をつけて下さい。15 の質問すべてについて、同じようにつづけて下さい。それぞれの質問について一つだけ答えてください。

### 質問1. 移動

- ア. 屋内や屋外、階段を、普通に(苦もなく)歩くことができる。
- イ. 屋内は苦もなく歩くことができる。しかし、屋外や階段では少し難しい。
- ウ. 屋内は助けなしに(補助具を使っても、使わなくても)歩くことができる。しかし、屋外や階段ではかなり難しかったり、人の助けを必要としたりする。
- エ. 屋内は、人の助けなしには歩くことができない。
- オ. 完全に寝たきりであり、動きまわることができない。

### 質問2. 視力

- ア. 普通に見ることができる。つまり、苦もなく(メガネをかけても、かけなくても)新聞やテレビの字幕を読むことができる。
- イ. 新聞やテレビの字幕を読むのが、少し難しい(メガネをかけても、かけなくても)。
- ウ. 新聞やテレビの字幕を読むのが、かなり難しい(メガネをかけても、かけなくても)。
- エ. 新聞やテレビの字幕を読むことはできない(メガネをかけても、かけなくても)。しかし、案内なしに歩き回ることができる。
- オ. 十分には見えないので、案内人なしには歩き回れない。つまり、ほとんどあるいは完全に失明している。

### 質問3. 聴力

- ア. 普通に、つまり普通の話し声を聞くことができる(補聴器を使っても、使わなくても)。
- イ. 普通の話し声を聞くのが、少し難しい。
- ウ. 普通の話し声を聞くのが、かなり難しい。会話では、普通よりも大きな声で話してもらう必要がある。
- エ. 大きな声でもあまり聞こえない。ほとんど耳が聞こえない。
- オ. 全く耳が聞こえない。

#### 質問4. 呼吸

- ア. 普通に息をすることができる。つまり、息切れしたり、息をするのが苦しくなったりすることはない。
- イ. きつい仕事やスポーツをするとか、平地やわずかな登り坂を急ぎ足に歩くと、息が切れる。
- ウ. 平地を同じような年齢の人と同じ早さで歩くと、息が切れる。
- エ. 軽い活動の後、たとえば、体を洗ったり服を着たりした後も、息が切れる。
- オ. ほとんどいつも、じっとしているときでも、息をするのが苦しい。

#### 質問5. 睡眠

- ア. 普通に眠ることができる。つまり、睡眠に問題は無い。
- イ. 睡眠に少し問題がある。たとえば、寝つきにくかったり、ときどき夜中に目が覚めたりする。
- ウ. 睡眠にかなり問題がある。たとえば、眠りが妨げられたり、じゅうぶん眠れなかったと感じたりする。
- エ. 睡眠に大きな問題がある。たとえば、睡眠薬をたびたび、あるいは日常的にのまなくてはならない。そうしないと、いつも夜中やとても朝早くに目が覚める。
- オ. ひどい不眠に苦しんでいる。たとえば、睡眠薬を限度までのんでもほとんど眠れなかったり、ほとんど一晩中、目が覚めていたりする。

#### 質問6. 食事

- ア. 普通に食えることができる。つまり、人の助けなしに。
- イ. 自分で食えるのが、すこし難しい(たとえば、のろのろと、ぎこちなく、ふるえて。あるいは、特別な食器を使って)。
- ウ. 食えるのに、いくらか人の助けを必要とする。
- エ. 自分でまったく食えることができない。そのため、人に食べさせてもらわなければならない。
- オ. まったく食えることができない。そのため、点滴や管から栄養を受けている。

#### 質問7. 話し

- ア. 普通に話すことができる。つまり、はっきりと、聞こえるように、すらすらと。
- イ. 話すのが少し難しい。たとえば、ときおり言葉を搜したり、ぶつぶつ言ったり、高低が変わる。
- ウ. 自分の考えを人に分らせることができる。しかし、自分の話は、とりとめがなく、口ごもり、つまったり、どもったりする。
- エ. 自分の話は、ほとんどの人にとって理解するのがたいへん難しい。
- オ. 身ぶりでしか、自分の考えを人に分らせることができない。

## 質問8. 排泄

- ア. 普通に、問題なく、排尿と排便ができる。
- イ. 排尿や排便に少し問題がある。たとえば、尿が出にくかったり、ゆるい便やかたい便であったりする。
- ウ. 排尿や排便にかなり問題がある。たとえば、時々「もらし」たり、ひどい便秘や下痢をしたりする。
- エ. 排尿や排便に重大な問題がある。たとえば、頻繁に「もらし」たり、導尿や浣腸を必要としたりする。
- オ. 排尿や排便が、まったく自分の思うようにならない。

## 質問9. 日常活動

- ア. 日常活動（たとえば、仕事、勉学、家事、余暇活動）を苦もなくすることができる。
- イ. 日常活動が、あまり上手くできなかったり、すこし難しかったりする。
- ウ. 日常活動が、ほとんど上手くできなかったり、かなり難しかったり、完全でなかったりする。
- エ. 以前できていた日常活動の一部分しか、やりとげることができない。
- オ. 以前できていた日常活動は、何もやりとげることができない。

## 質問 10. 精神機能

- ア. はっきりと、すじ道を立てて考えることができる。記憶の働きは良い。
- イ. はっきりと、すじ道を立てて考えるのが、すこし難しかったり、記憶がときどきまちがったりする。
- ウ. はっきりと、すじ道を立てて考えるのが、かなり難しかったり、記憶が多少そこなわれていたりする。
- エ. はっきりと、すじ道を立てて考えるのが、たいへん難しかったり、記憶がひどくそこなわれていたりする。
- オ. ずっと頭が混乱したままであり、場所と時間の見当を失っている。

## 質問 11. 不快と症状

- ア. からだに、不快や症状はまったく無い。たとえば、痛み、うずき、はきけ、かゆみなど。
- イ. からだに、かるい不快や症状がある。たとえば、痛み、うずき、はきけ、かゆみなど。
- ウ. からだに、かなり不快や症状がある。たとえば、痛み、うずき、はきけ、かゆみなど。
- エ. からだに、ひどい不快や症状がある。たとえば、痛み、うずき、はきけ、かゆみなど。
- オ. からだに、耐え難い不快や症状がある。たとえば、痛み、うずき、はきけ、かゆみなど。

### 質問 12. うつ

- ア. 悲しみや、ゆううつ、落ち込みをまったく感じない。
- イ. 悲しみや、ゆううつ、落ち込みをすこし感じている。
- ウ. 悲しみや、ゆううつ、落ち込みをかなり感じている。
- エ. 悲しみや、ゆううつ、落ち込みをたいへん感じている。
- オ. 悲しみや、ゆううつ、落ち込みをきわめてつよく感じている。

### 質問 13. なやみ

- ア. ストレスや、いらいら、不安をまったく感じない。
- イ. ストレスや、いらいら、不安をすこし感じている。
- ウ. ストレスや、いらいら、不安をかなり感じている。
- エ. ストレスや、いらいら、不安をたいへん感じている。
- オ. ストレスや、いらいら、不安をきわめてつよく感じている。

### 質問 14. 活力

- ア. 健康で活力があると感じている。
- イ. 疲れや、飽き、弱りをすこし感じている。
- ウ. 疲れや、飽き、弱りをかなり感じている。
- エ. 疲れや、飽き、弱りをたいへん感じており、ほとんど疲れはてている。
- オ. 疲れや、飽き、弱りをきわめてつよく感じており、まったく疲れはてている。

### 質問 15. 性活動

- ア. 健康状態は、性活動に不都合な影響をまったく及ぼしていない。
- イ. 健康状態は、性活動にすこし影響を及ぼしている。
- ウ. 健康状態は、性活動にかなり影響を及ぼしている。
- エ. 健康状態のため、性活動がほとんどできない。
- オ. 健康状態のため、性活動ができない。
